# Supplementary material for: Lineage-specific Expression of miR-200 Family in Human Embryonic Stem Cells during In Vitro Differentiation
Source: PubMed Central journal article supplement — Int J Stem Cells. 2017 May;10(1):28–37. doi: 10.15283/ijsc17013 (PMC5488774; doi:10.15283/ijsc17013), 2017-05
Supplement: ijsc-10-028_suppl.pdf [file ijsc-10-028_suppl.pdf]

**Table S1.** Primers used in this study

| Gene name            | NCBI NO.       | Direction | Sequence                  |
|----------------------|----------------|-----------|---------------------------|
| CLAUDIN1             | NM_021101      | Forward   | TTGACTCCTTGCTGAATCTGAG    |
|                      |                | Reverse   | TTCTGCACCTCATCGTCTTC      |
| E-CADHERIN           | NM_004360      | Forward   | TTCTGCTGCTCTTGCTGTTTCTTC  |
|                      |                | Reverse   | TTCTCCGCCTCCTTCTTCATCATAG |
| INTEGRIN- $\alpha$ 5 | NM_002205      | Forward   | GGCAGCTATGGCGTCCCACTGTGG  |
|                      |                | Reverse   | GGCATCAGAGGTGGCTGGAGGCTT  |
| MMP1                 | NM_002421      | Forward   | GGGCTTGAAGCTGCTTACGA      |
|                      |                | Reverse   | TGTCCCTGAACAGCCCAGTAC     |
| N-CADHERIN           | NM_001308176.1 | Forward   | ATCCTACTGGACGGTTCG        |
|                      |                | Reverse   | TTGGCTAATGGCACTTGA        |
| OCCLUDIN             | NM_002538      | Forward   | GCAAAGTGAATGACAAGCGG      |
|                      |                | Reverse   | CACAGGCGAAGTTAATGGAAG     |
| VIMENTIN             | NM_003380      | Forward   | CTGAATGACCGCTTCGCCAAC     |
|                      |                | Reverse   | TCCCGCATCTCCTCCTCGTAG     |
| ZO-1                 | NM_001301025   | Forward   | TGCTGAGTCCTTTGGTGATG      |
|                      |                | Reverse   | AATTTGGATCTCCGGGAAGAC     |
